# Supplementary material
Source: PubMed Central journal article supplement (PMC1899882)

TAF7

DAPI

TAF7 + DAPI

+/Y

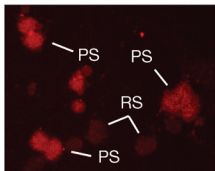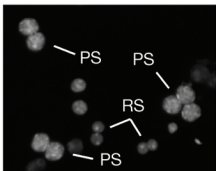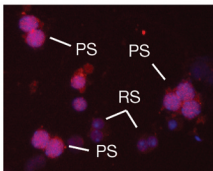

-/Y

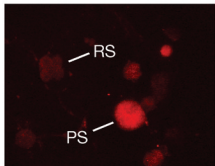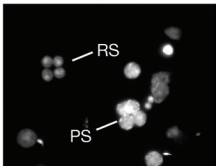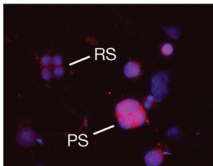

**Supplementary Fig. S1**

Supplement: molcellb_27_7_2582__1.pdf [file molcellb_27_7_2582__1.pdf]
